# Supplementary material for: Quality Control of Stem Cell-Based Cultured Meat According to Specific Differentiation Abilities
Source: MDPI journal article supplement (doi:10.3390/cells13020135), 2024-01-11
Supplement: s1 [file s1]

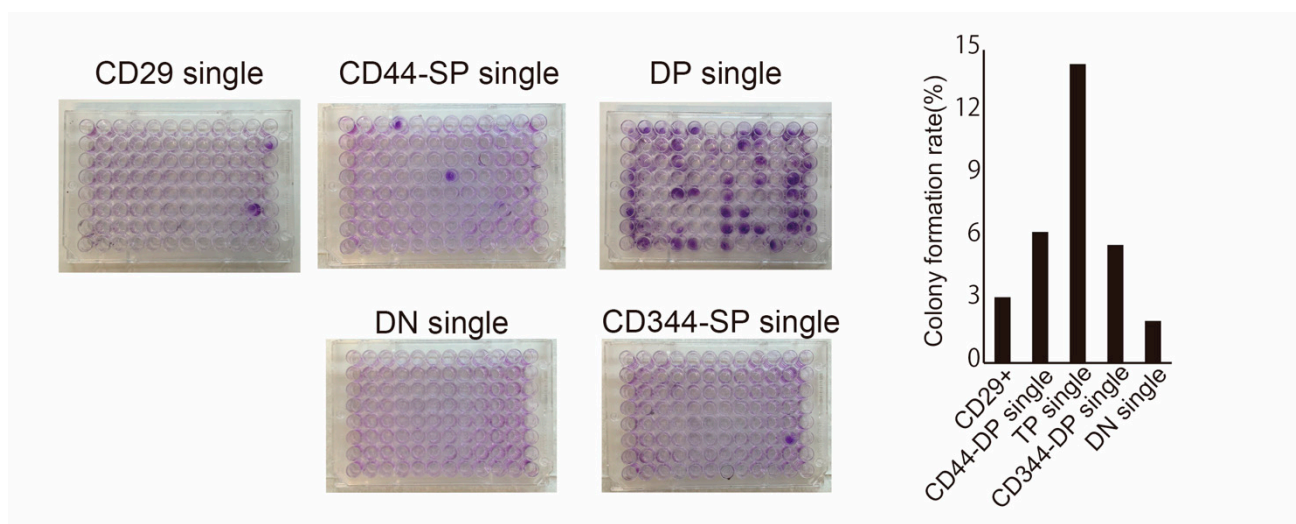

**Figure S1.** Single-cell assay in CD44-SP, DP, CD344-SP, and DN populations. Single CD44SP, DP, CD344-SP, DN, and CD29+ cells were sorted and cultured in 96-well plates for 2 weeks. Cells were stained with crystal violet, and the colony-forming ratio was calculated based on the number of viable and formed cells. n = 3.

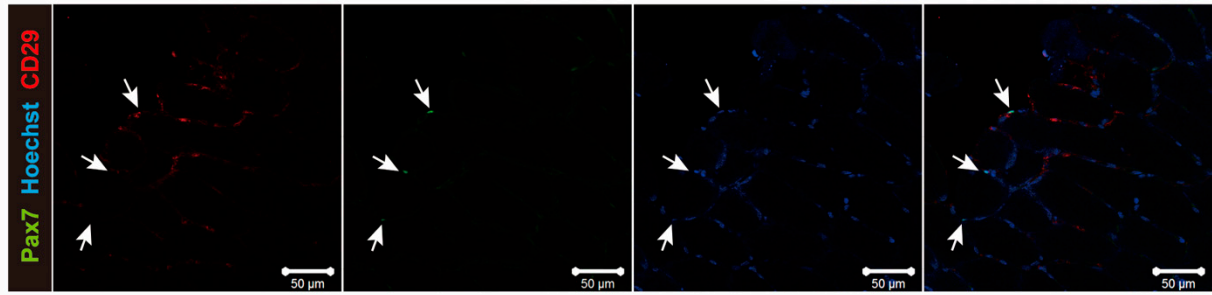

**Figure S2.** Expression of CD29<sup>+</sup> and Pax7 are present between muscle fibers. In bovine muscle tissue immunostaining, we verified that CD29<sup>+</sup> cells were derived from between muscle fibers, as CD29 and Pax7 colocalized in the area. Muscle marker: Pax7 is shown in green. CD29 (red) and cell nuclei (Hoechst, blue) are shown. Arrowheads indicate the localization of Pax7.

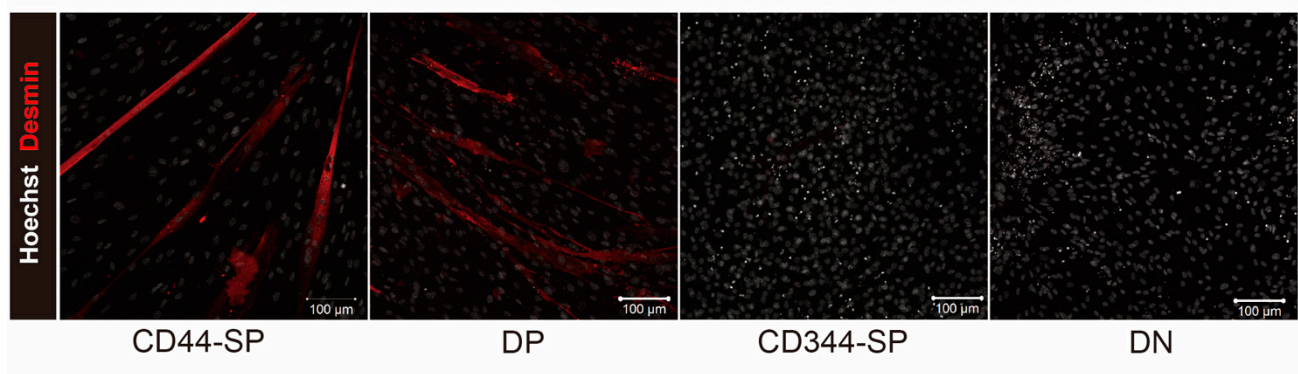

**Figure S3.** Immunohistochemical analysis of induced differentiation in CD44-SP, DP, CD344-SP, and DN cells, in passage 4 on day 5 under undifferentiated conditions. Scale bar = 100  $\mu\text{m}$ .

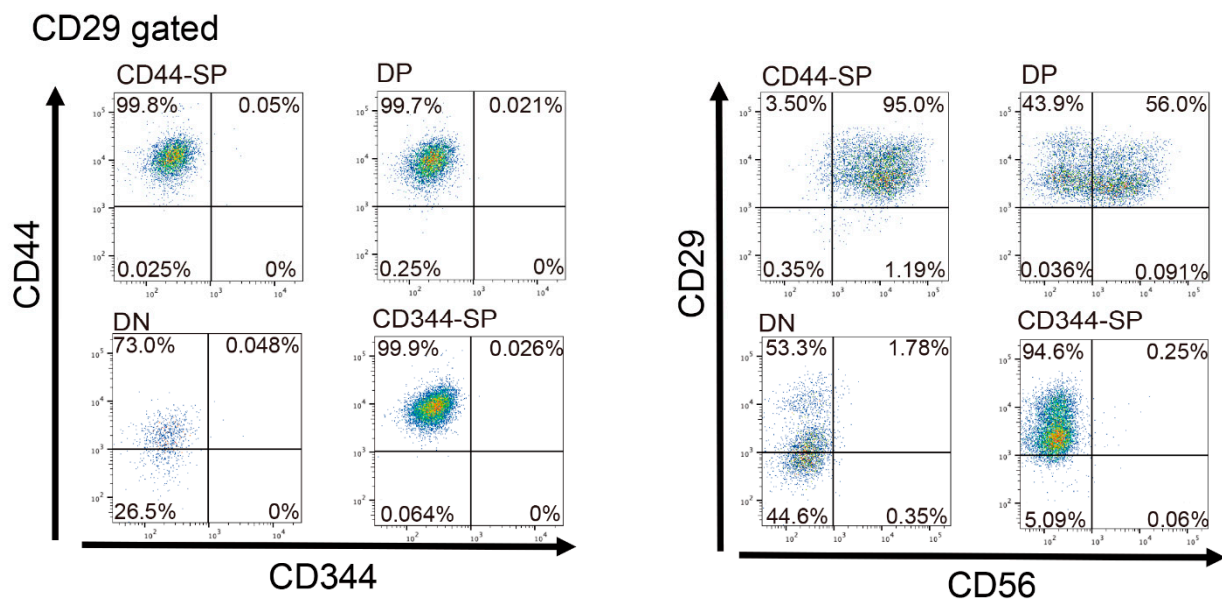

**Figure S4.** Representative flow cytometric profiles analyzing cell surface markers CD44SP, DP, CD344-SP, and DN in passage 2, stained with CD29, CD44, CD344, and CD56 antibodies.

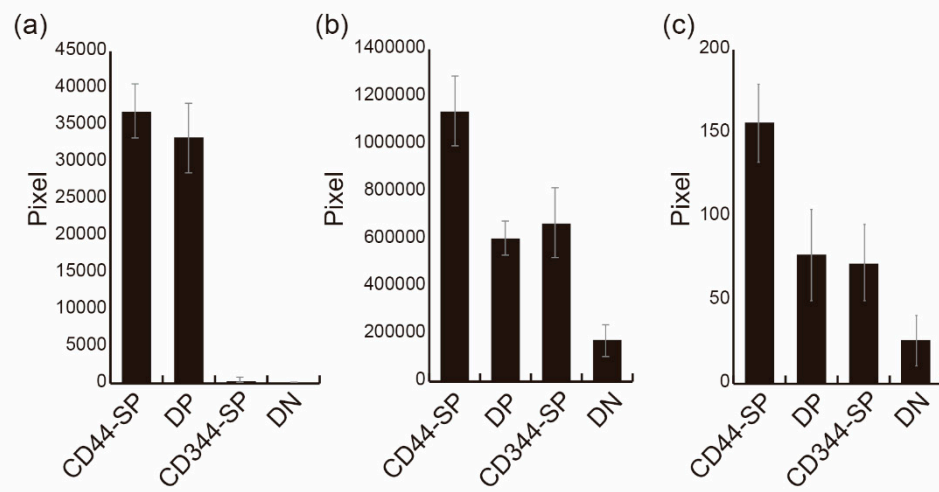

**Figure S5.** Differentiation potential of CD44-SP, DP, CD344-SP, and DN. (a) Muscle differentiation. (b) Bone differentiation. (c) Chondrogenic differentiation. n = 3

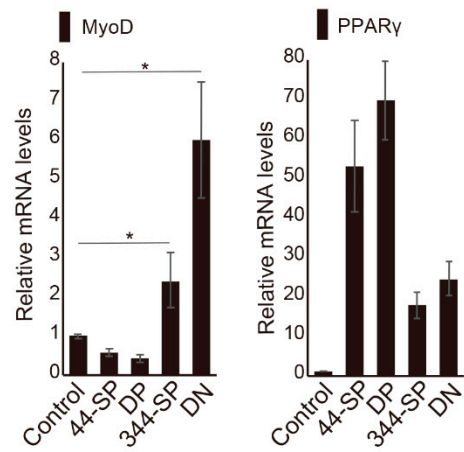

**Figure S6.** Relative mRNA expression of myogenic gene MYOD and adipogenic gene PPAR $\gamma$  after 5 days of myogenic differentiation. n = 3.

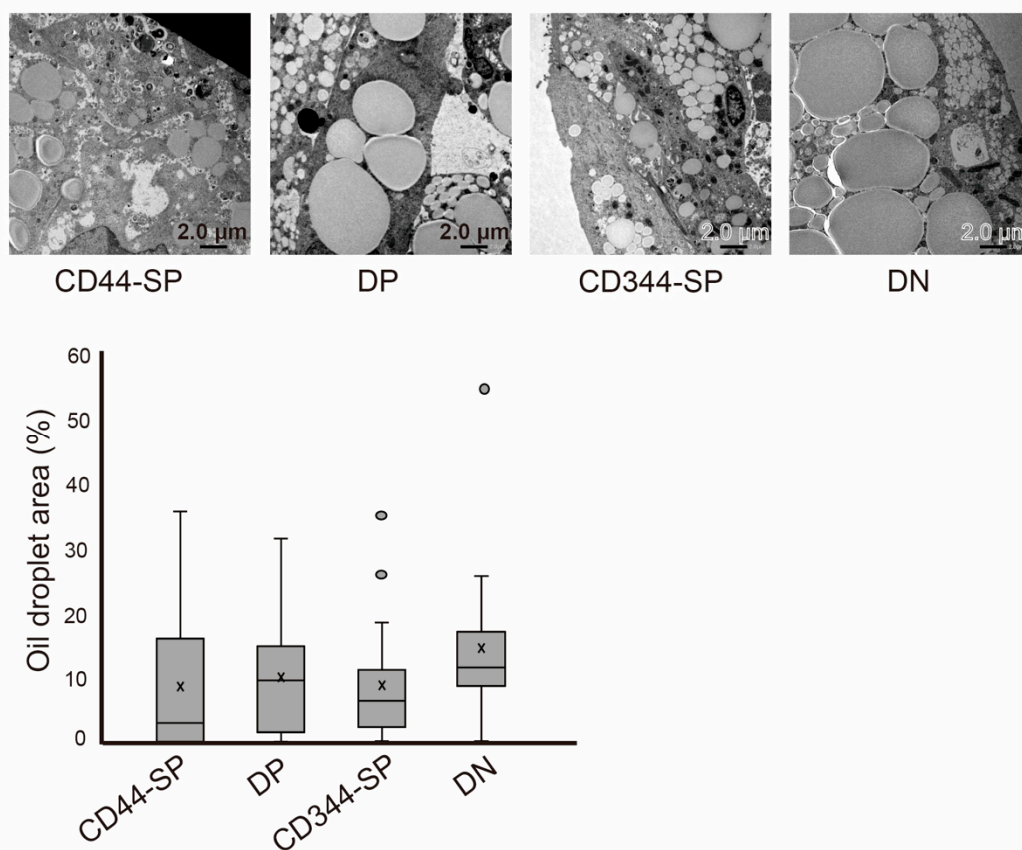

**Figure S7.** Transmission electron microscope observations at 1200 × magnification. The area of oil droplet volume for CD44-SP, DP, CD344-SP, and DN was compared. DN group exhibited larger droplets. However, no significant changes were observed in the average area of oil droplets accumulated in the DN group.

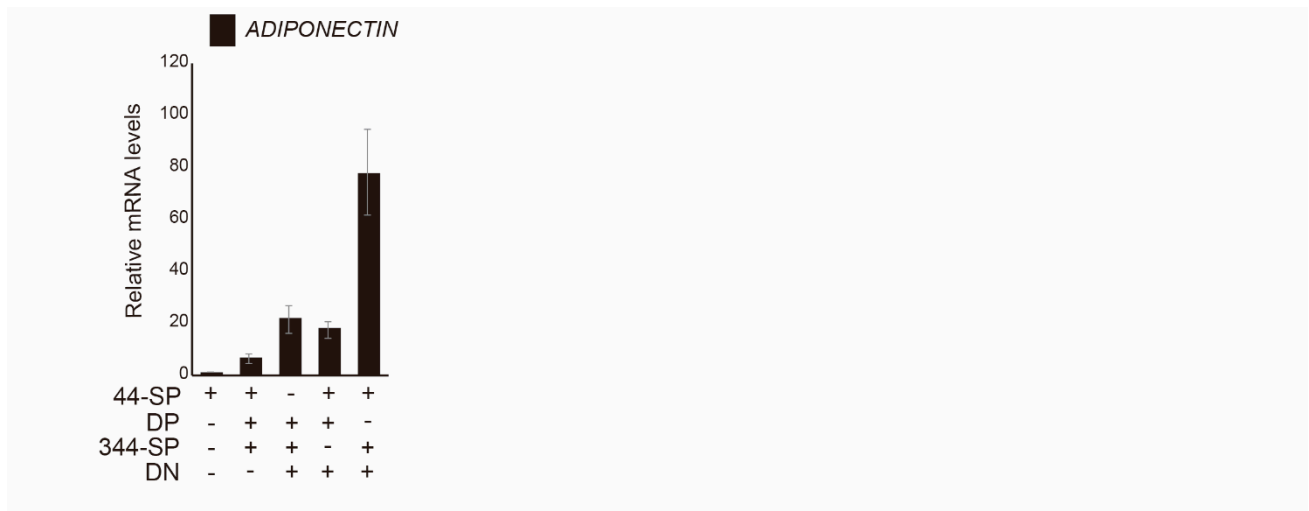

**Figure S8.** Relative expression of ADIPONECTIN in meat buds prepared by mixing equal proportions of three types of cells from CD44-SP, DP, CD344-SP, and DN was measured using real-time RT-PCR. n = 2.



**Supplemental Table S1.** Primer sequences for the RT-qPCR.

|                | 5'-Forward-'3         | 3'-Forward-'5          |
|----------------|-----------------------|------------------------|
| $\beta$ -actin | GGCACCCAGCACAAATGAAGA | CAGCTAACAGTCCGCCTAGAA  |
| Pax7           | GACTCCGGACGTGGAGAAAA  | TCCAGACGGTTCCCTTTGTC   |
| Desmin         | CGGCTACCAGGACAACATTG  | CCGGGTCTCAATGGTCTTGA   |
| C/EBP $\alpha$ | GCAAAGCCAAGAAGTCCG    | GGCTCAGTTGTTCCACCCGCTT |
| C/EBP $\beta$  | CGACAGTTGCTCCACCTTCT  | CTCGCAGGTCAAGAGCAAG    |
| PPAR $\gamma$  | AAATCCCTGTTCCGTGCTGT  | GTCAGCTCTTGGGAACGGAA   |
| Leptin         | CGTGACCTTCTTTGGGATTT  | AGGGACCATCCACTGAAGTC   |
| Adiponectin    | CCTGGTGAGAAGGGTGAGAA  | GTGACCTGTCTCTCCAGTCC   |
